# Supplementary material for: Microbiome-metabolome interactions predict host phenotype
Source: Research Square preprint supplement (doi:10.21203/rs.3.rs-2352852/v1), 2022-12-07
Supplement: Supplementary file 1 [file f9d28bb37112ca6a307d0674.pdf]

## Supplemetary Material

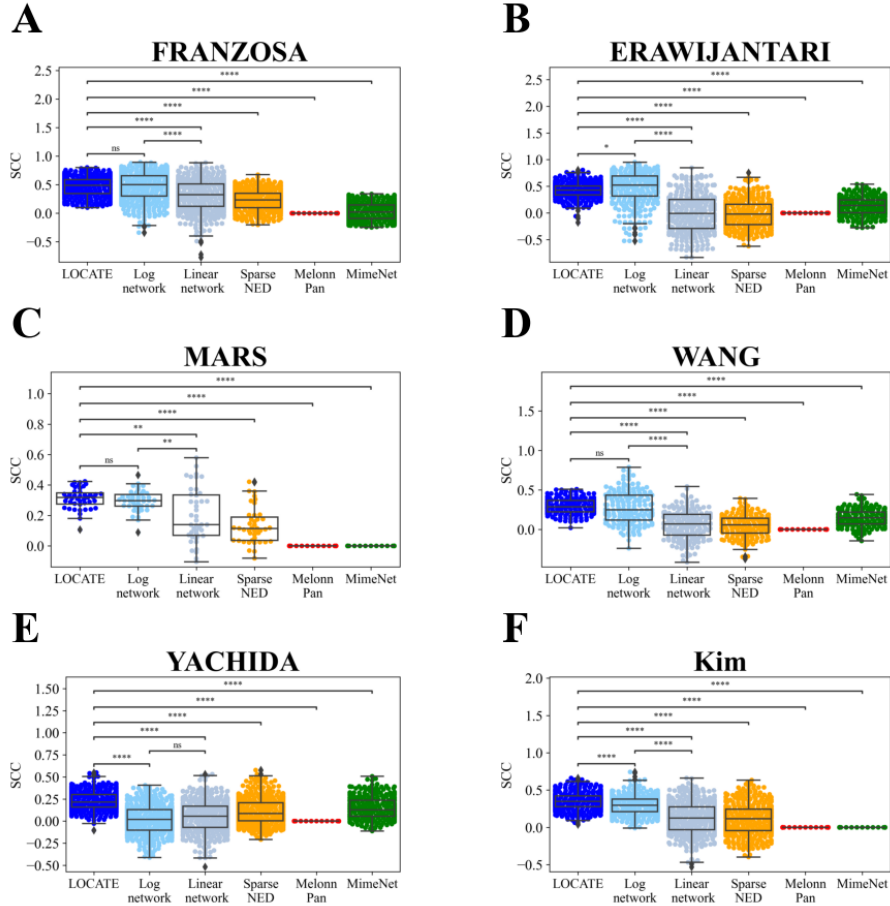

Figure 1: Latent representation of microbiome can be used to predict metabolites in each dataset separately better than all existing methods. **A - E.** Comparison between LOCATE and all state-of-the-art metabolites prediction models as well as a Linear network and a Log network over the different datasets FRANZOSA (**A**), ERAWIJANTARI(**B**), MARS (**C**), WANG (**D**) and YACHIDA (**E**).**F.** Comparison between LOCATE and all state-of-the-art metabolites prediction models as well as a Linear network and a Log network over the Kim dataset.

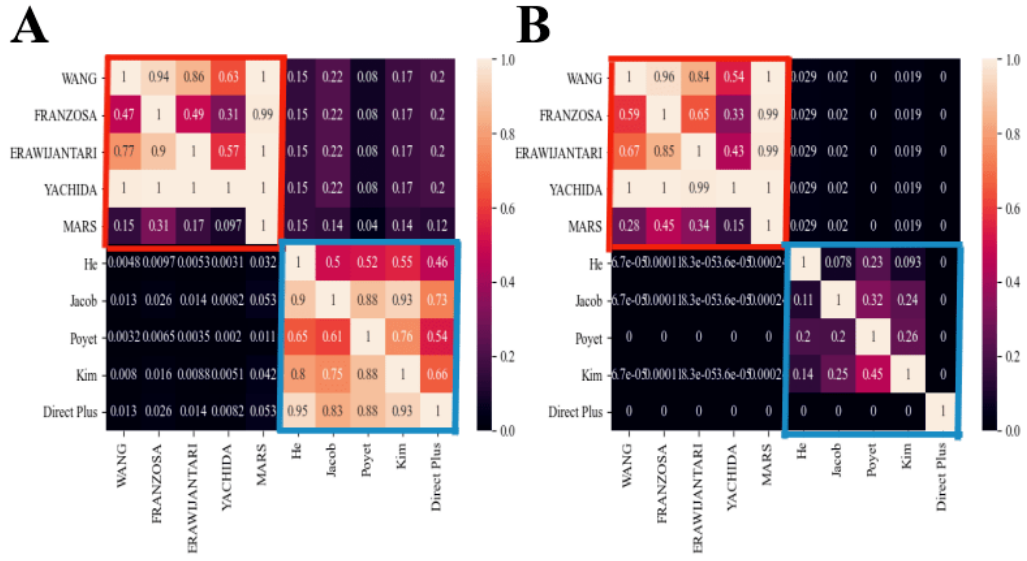

Figure 2: Intersections between pairs of cohorts of 16S and WGS at the order taxonomic level (A), and at the species level (B). The overlap between the pairs of the WGS datasets (red) is much higher than the overlap in the 16S datasets (blue), especially at the species level. The overlap between 16S and 16S is higher than the overlap between 16S and WGS, although the number of taxa in WGS is much higher than 16S, and one could expect the 16S taxa to be included in the WGS.

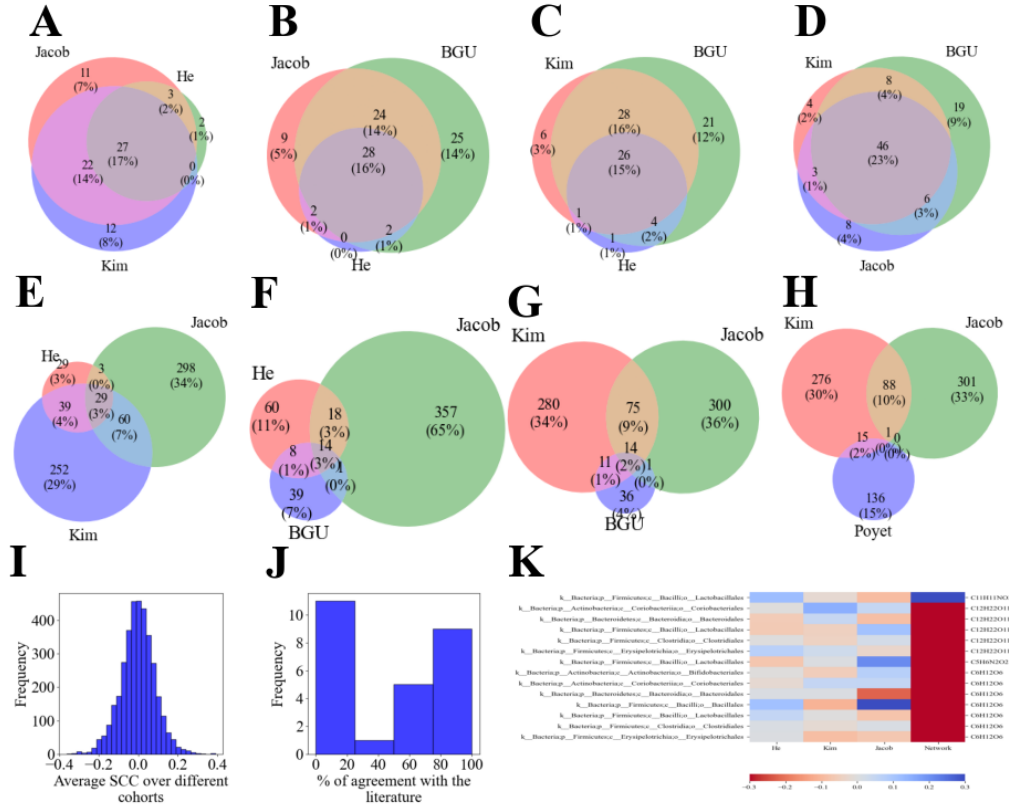

Figure 3: Low intersection between the orders microbiome and metabolites of different cohorts. **A - D.** Venn diagrams of the microbiome of triads 16S datasets. **E - H.** Venn diagrams of the metabolites of triads 16S datasets. Each color represents a dataset, and the intermediate colors represent the intersection. **I.** Histogram of average SCCs between each microbe and each metabolite that appears at least at 2 cohorts (of the 16S cohorts). The histogram's peak is at 0.0, what emphasizes the inconsistent SCCs cross datasets. **J.** Histogram of percent of agreement with the correlations reported in the literature and the correlations found in the cohorts. Most of the correlations do not agree with the literature. **K.** Heatmap of NMF coefficients between microbes and metabolites over different datasets (He, Kim and Jacob) vs the relations that are reported in the literature. Blue/Red colors represent positive/negative correlations. The relations vary between different datasets and do not preserve the known relations from the literature [1].

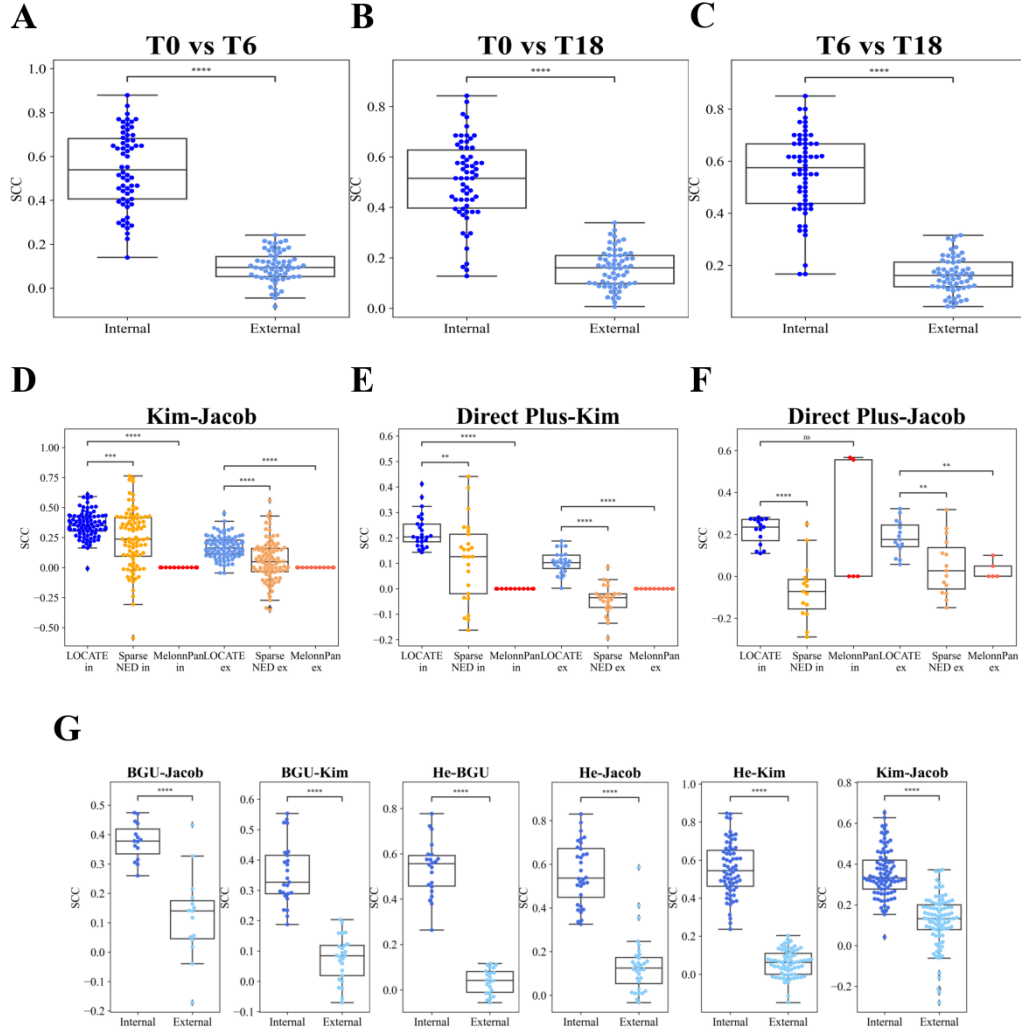

Figure 4: Microbiome-metabolite relations are dataset specific. **A - C**. Swarm plots of LO-CATE's predicted metabolites SCCs in the cross-times test over the Direct Plus cohort. The dark blue points represent the SCCs of the "in-learning", referred as "Internal", where only one time point was used for the training and the testing, by 10 CV approach. The lightblue points represent the SCCs of the "ex-learning", referred as "External", where LOCATE is trained on one time point and is tested on another one. There is a decrease in the accuracy of the ex-learning vs the in-learning. The stars follow all other figures. **D - F**. Swarm plots of all of the cross-datasets learning between couples of datasets, Kim-Jacob (**D**), Direct Plus-Kim(**E**), Direct Plus-Jacob (**F**). **G**. Swarm plots of all of the cross-datasets learning between couples of datasets of the Log network model. The decline in performance between the "in-learning" and "ex-learning" can be seen here too.

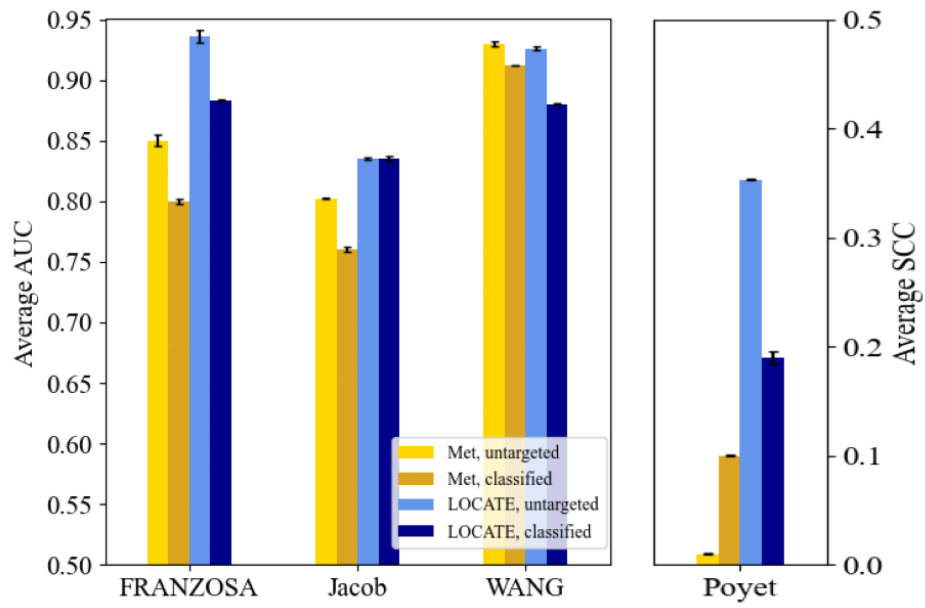

Figure 5: Phenotype predictions based on targeted metabolites vs untargeted metabolites. In each cohort with untargeted metabolites, the phenotype is predicted once based on models which are trained only on classified metabolites (the dark bars), and once on all the metabolites including unclassified ones. LOCATE based on untargeted metabolites (lightblue) outperforms all the other methods. The performance is measured as the average AUC (for binary phenotypes) and SCC for continuous phenotypes on a test set over 10 CVs. The black error bars represent the standard errors within the 10 CVs.

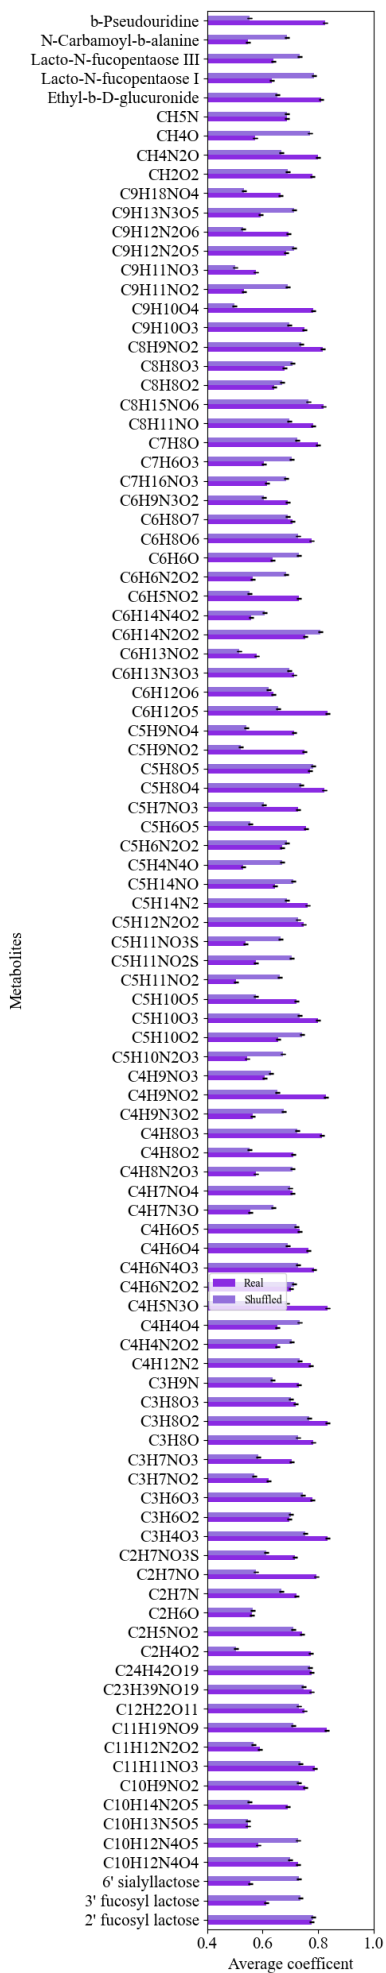

Figure 6: Average coefficients of each metabolite in the real dataset (dark bar) and in the shuffled one (light bar). The black error bars are for the standard errors.

# 1 Supp. Mat. Tables

Table 1: Summary of current state-of-the-art methods

| Model      | Advantages                                                                                                                                                                                                                                                         | Disadvantages                                                                                                                                                                                                                                       | Ref    |
|------------|--------------------------------------------------------------------------------------------------------------------------------------------------------------------------------------------------------------------------------------------------------------------|-----------------------------------------------------------------------------------------------------------------------------------------------------------------------------------------------------------------------------------------------------|--------|
| PRMT       | 1. First framework.<br>2. Significant correlations between PRMT scores and relative abundances of selected environmental measurements.                                                                                                                             | 1. Based on biological known networks.<br>2. Limited only to the KEGG database.<br>3. Performance is limited.<br>4. Not transferable (mixed datasets, between datasets).                                                                            | [2]    |
| MIMOSA     | 1. Gives information about the contribution of each taxon to the metabolites.<br>2. Succeed to predict relations in real and simulated datasets.<br>3. Freely available web server.                                                                                | 1. Based on biological known networks.<br>2. Limited only to the KEGG database.<br>3. Requires the original sequences data.<br>4. Performance is limited (worse than MelonnPan).<br>5. Not transferable (mixed datasets, between datasets).         | [3, 4] |
| Mangosteen | 1. Success in specific metabolites.                                                                                                                                                                                                                                | 1. Based on biological known networks.<br>2. Limited only to the KEGG database.<br>3. Performance is limited (worse than MelonnPan and MIMOSA).<br>4. Not transferable (mixed datasets, between datasets).                                          | [5]    |
| MelonnPan  | 1. Best performance among existing state-of-the-arts.<br>2. Quite a good definition for well-predicted metabolites.<br>3. Independent from previous biological knowledge.                                                                                          | 1. Long running times (run for each metabolite separately).<br>2. Cannot cope with all metabolites.<br>3. Sometimes returns the same prediction to all samples for specific metabolites.<br>4. Not transferable (mixed datasets, between datasets). | [6]    |
| MiMeNet    | 1. Learning multiple metabolites simultaneously enables us to find relations between the metabolites.<br>2. They claim it is better than existing state-of-the-art methods (PRMT, MelonnPan, and SparseNED).<br>3. Independent from previous biological knowledge. | 1. Long-running time.<br>2. Performance is limited in the external test within a dataset.<br>3. Not transferable (mixed datasets, between datasets).                                                                                                | [7]    |
| SparseNED  | 1. Learning multiple metabolites simultaneously enables us to find relations between the metabolites.<br>2. Quite short running times.<br>3. Independent from previous biological knowledge.                                                                       | 1. Performance is limited within a dataset (worse than MelonnPan).<br>2. Not transferable (mixed datasets, between datasets).                                                                                                                       | [8]    |

Table 2: Datasets details

| Dataset      | Cohort description                                                                                                                                                                                                           | 16S or WGS | N (subjects) |         | N (samples) |         | Targeted / untargeted | Ref  |
|--------------|------------------------------------------------------------------------------------------------------------------------------------------------------------------------------------------------------------------------------|------------|--------------|---------|-------------|---------|-----------------------|------|
|              |                                                                                                                                                                                                                              |            | Case         | Control | Case        | Control |                       |      |
| Direct Plus  | 18-month randomized clinical trial, we assigned 294 participants with abdominal obesity/dyslipidemia into healthy dietary guidelines (HDG), MED and green-MED weight-loss diet groups, all accompanied by physical activity. | 16S        | NA           | 294     | NA          | 784     | Targeted              | [9]  |
| Kim          | Patients with advanced colorectal adenomas, colorectal cancer, and controls.                                                                                                                                                 | 16S        | 138          | 102     | 138         | 102     | Untargeted            | [10] |
| He           | Infants over several time points during the 1st year of life, either breast-fed, formula-fed, or experimental formula fed.                                                                                                   | 16S        | NA           | 80      | NA          | 277     | Targeted              | [11] |
| Jacob        | Inflammatory bowel disease patients and their first degree (healthy) relatives.                                                                                                                                              | 16S        | 36           | 54      | 36          | 54      | Untargeted            | [12] |
| Poyet        | Longitudinal samples from healthy donors to the Broad Institute-OpenBiome Microbiome Library (BIO-ML).                                                                                                                       | 16S        | NA           | 83      | NA          | 164     | Untargeted            | [13] |
| ERAWIJANTARI | Patients who underwent colonoscopy, half of which with a history of gastrectomy for gastric cancer and no signs of gastric cancer recurrence.                                                                                | WGS        | 42           | 54      | 42          | 54      | Targeted              | [14] |
| FRANZOSA     | Inflammatory bowel disease patients and controls (PRISM cohort + A validation cohort).                                                                                                                                       | WGS        | 164          | 56      | 164         | 56      | Untargeted            | [15] |
| MARS         | Longitudinal samples (over 6 months) from patients with Irritable Bowel Syndrome and controls.                                                                                                                               | WGS        | 51           | 24      | 305         | 139     | Targeted              | [16] |
| WANG         | Adults with end-stage renal disease (ESRD) and controls.                                                                                                                                                                     | WGS        | 220          | 67      | 220         | 67      | Untargeted            | [17] |
| YACHIDA      | Patients who underwent colonoscopy, with findings from normal to stage 4 colorectal cancer.                                                                                                                                  | WGS        | 220          | 127     | 220         | 127     | Targeted              | [18] |



Table 3: LOCATE’s hyperparameters used

|                                  | <b>BGU</b> | <b>He</b> | <b>Jacob</b> | <b>Kim</b> | <b>Poyet</b> |
|----------------------------------|------------|-----------|--------------|------------|--------------|
| <b>Activation function</b>       | Tanh       | elU       | Tanh         | Tanh       | elU          |
| <b>Dropout</b>                   | 0.002      | 0.070     | 0.209        | 0.002      | 0.079        |
| <b>Weight decay</b>              | 0.127      | 0.030     | 0.138        | 0.120      | 0.020        |
| <b>Learning rate</b>             | 0.001      | 0.001     | 0.05         | 0.001      | 0.001        |
| <b>Number of neurons layer1</b>  | 90         | 20        | 20           | 90         | 20           |
| <b>Number of neurons layer 2</b> | 80         | 10        | 30           | 80         | 10           |
| <b>Representation size</b>       | 10         | 10        | 10           | 10         | 10           |
| <b>Optimizer</b>                 | Adam       | Adam      | Adam         | Adam       | Adam         |
| <b>Max epochs</b>                | 1000       | 1000      | 1000         | 1000       | 1000         |

Table 4: Metadata of each cohort

| <b>Dataset</b> | <b>Metadata used</b>                                                                                                                                                                                                                             |
|----------------|--------------------------------------------------------------------------------------------------------------------------------------------------------------------------------------------------------------------------------------------------|
| Direct Plus    | Diet, sex, height                                                                                                                                                                                                                                |
| He             | Diet, age, sex                                                                                                                                                                                                                                   |
| Jacob          | Sex, age,pedigree                                                                                                                                                                                                                                |
| Poyet          | Travel abroad last year, seasonal Pollen allergy, weight, height, BMI<br>country birth, sex, relationship status, pet allergy, diet, age                                                                                                         |
| Kim            | Age, sex, race, smoking history                                                                                                                                                                                                                  |
| ERAWIJANTARI   | Smoking status, lung cancer, drinking status, breast cancer, glucose, liver cancer,<br>total cholesterol, diabetes med, analgesic, anticoagulant, gastric acid medication, high<br>blood pressure, uterine cancer, sex, alcohol consumption, age |
| FRANZOSA       | Age, antibiotic, immunosuppressant, mesalamine, steroids,                                                                                                                                                                                        |
| WANG           | Age, BMI, Creatinine , Urea, eGFR, sex                                                                                                                                                                                                           |
| MARS           | Age, BMI, sex, antibiotics                                                                                                                                                                                                                       |
| YACHIDA        | Age, sex, BMI, alcohol                                                                                                                                                                                                                           |

Table 5: WGS 4 different clusters cross-datasets WGS

| Pair                                      | Cluster num | Color     |
|-------------------------------------------|-------------|-----------|
| s__Pauljensenia turicensis-C5H11NO2       | 1           | lightgrey |
| s__Collinsella sp900551195-C6H13NO2       | 1           | lightgrey |
| s__Collinsella sp900551605-C6H13NO2       | 1           | lightgrey |
| s__Collinsella sp900759435-C4H4N2O2       | 1           | lightgrey |
| s__Eggerthella lenta-C6H13NO2             | 1           | lightgrey |
| s__Eggerthella sp014287365-C6H13NO2       | 1           | lightgrey |
| s__Prevotella sp000431975-C4H4N2O2        | 1           | lightgrey |
| s__Alistipes sp002428825-C4H4N2O2         | 1           | lightgrey |
| s__Alistipes sp900021155-C4H4N2O2         | 1           | lightgrey |
| s__Tidjanibacter inops.A-C4H4N2O2         | 1           | lightgrey |
| s__Confluentibacter sp003258355-C5H4N4O   | 1           | lightgrey |
| s__Clostridium saudiense-C6H13NO2         | 1           | lightgrey |
| s__Clostridium sp900543325-C6H13NO2       | 1           | lightgrey |
| s__Acetatifactor sp002431915-C4H4N2O2     | 1           | lightgrey |
| s__Acetatifactor sp900771995-C4H4N2O2     | 1           | lightgrey |
| s__Acetatifactor sp900772845-C4H4N2O2     | 1           | lightgrey |
| s__Coproccoccus sp900548315-C4H4N2O2      | 1           | lightgrey |
| s__Lachnospira sp900547255-C4H4N2O2       | 1           | lightgrey |
| s__UBA11774 sp003507655-C3H5O3-           | 1           | lightgrey |
| s__UBA7182 sp002491115-C4H4N2O2           | 1           | lightgrey |
| s__Acutalibacter sp009936035-C4H4N2O2     | 1           | lightgrey |
| s__Acutalibacter sp900543305-C4H4N2O2     | 1           | lightgrey |
| s__Ruminococcus.E sp900315195-C6H14N2O2   | 1           | lightgrey |
| s__Ruminococcus.E sp902797655-C6H14N2O2   | 1           | lightgrey |
| s__UBA737 sp900554525-C4H4N2O2            | 1           | lightgrey |
| s__CAG-170 sp000432135-C4H4N2O2           | 1           | lightgrey |
| s__Dysosmobacter sp900752075-C4H4N2O2     | 1           | lightgrey |
| s__UBA5446 sp900543085-C4H4N2O2           | 1           | lightgrey |
| s__Ruminococcus sp900540005-C4H4N2O2      | 1           | lightgrey |
| s__CAG-145 sp900545135-C4H4N2O2           | 1           | lightgrey |
| s__Emergencia sp900551775-C4H4N2O2        | 1           | lightgrey |
| s__NSJ-50 sp014385105-C4H4N2O2            | 1           | lightgrey |
| s__UBA2862 sp902790525-C3H7NO2            | 1           | lightgrey |
| s__Christensenella massiliensis-C26H43NO6 | 1           | lightgrey |
| s__UBA2897 sp002350105-C6H14N2O2          | 1           | lightgrey |
| s__Fusobacterium.A sp900015295-C3H7NO2    | 1           | lightgrey |
| s__D16-34 sp009911635-C3H5O2-             | 2           | darkgrey  |
| s__Alistipes sp002428825-C5H4N4O          | 2           | darkgrey  |
| s__Alistipes sp900549305-C5H4N4O          | 2           | darkgrey  |
| s__Parabacteroides sp011038785-C4H4N2O2   | 2           | darkgrey  |
| s__RC9 sp900546445-C5H4N4O                | 2           | darkgrey  |
| s__Streptococcus hyointestinalis-C6H13NO2 | 2           | darkgrey  |
| s__Streptococcus parasanguinis.A-C6H13NO2 | 2           | darkgrey  |
| s__Streptococcus parasanguinis.B-C6H13NO2 | 2           | darkgrey  |
| s__Streptococcus parasanguinis.C-C6H13NO2 | 2           | darkgrey  |

Table 5: WGS 4 different clusters cross-datasets WGS

| Pair                                        | Cluster num | Color    |
|---------------------------------------------|-------------|----------|
| s__Streptococcus parasanguinis_D-C6H13NO2   | 2           | darkgrey |
| s__Streptococcus sp000314795-C6H13NO2       | 2           | darkgrey |
| s__Streptococcus sp000448565-C6H13NO2       | 2           | darkgrey |
| s__Streptococcus sp900543065-C6H13NO2       | 2           | darkgrey |
| s__Streptococcus sp900766505-C6H13NO2       | 2           | darkgrey |
| s__UBA9502 sp004554205-C5H4N4O              | 2           | darkgrey |
| s__NSJ-32 sp014384895-C5H4N4O               | 2           | darkgrey |
| s__CAG-110 sp003525905-C5H4N4O              | 2           | darkgrey |
| s__CAG-83 sp900545585-C5H4N4O               | 2           | darkgrey |
| s__Dysosmobacter sp001916835-C5H4N4O        | 2           | darkgrey |
| s__ER4 sp900552015-C5H4N4O                  | 2           | darkgrey |
| s__Flavonifractor sp900549795-C5H4N4O       | 2           | darkgrey |
| s__HGM12998 sp900756495-C5H4N4O             | 2           | darkgrey |
| s__Intestinimonas butyriciproducens-C5H4N4O | 2           | darkgrey |
| s__Intestinimonas massiliensis-C5H4N4O      | 2           | darkgrey |
| s__UBA3855 sp902783005-C3H5O2-              | 2           | darkgrey |
| s__UMGS1889 sp900556055-C5H4N4O             | 2           | darkgrey |
| s__Emergencia sp900551775-C26H43NO6         | 2           | darkgrey |
| s__Phil1 sp001940855-C5H4N4O                | 2           | darkgrey |
| s__UMGS692 sp900544545-C3H5O2-              | 2           | darkgrey |
| s__Firm-10 sp001603025-C3H5O2-              | 2           | darkgrey |
| s__HGM11575 sp002068815-C3H5O2-             | 2           | darkgrey |
| s__UBA2862 sp900315585-C3H5O2-              | 2           | darkgrey |
| s__UBA2862 sp900318045-C3H5O2-              | 2           | darkgrey |
| s__UBA2862 sp902798105-C3H5O2-              | 2           | darkgrey |
| s__QALW01 sp003150515-C26H43NO6             | 2           | darkgrey |
| s__Akkermansia sp004167605-C3H5O2-          | 2           | darkgrey |
| s__Porphyromonas sp900539155-C5H11NO2       | 3           | dimgrey  |
| s__Alistipes putredinis-C5H11NO2            | 3           | dimgrey  |
| s__Alistipes senegalensis-C5H11NO2          | 3           | dimgrey  |
| s__Alistipes shahii-C5H11NO2                | 3           | dimgrey  |
| s__Alistipes sp900021155-C5H11NO2           | 3           | dimgrey  |
| s__Alistipes sp900541585-C5H11NO2           | 3           | dimgrey  |
| s__Alistipes_A indistinctus-C5H11NO2        | 3           | dimgrey  |
| s__UBA940 sp900768115-C5H11NO2              | 3           | dimgrey  |
| s__W3P20-009 sp004552385-C5H11NO2           | 3           | dimgrey  |
| s__NSJ-32 sp014384895-C5H11NO2              | 3           | dimgrey  |
| s__Acutalibacter timonensis-C5H11NO2        | 3           | dimgrey  |
| s__NSJ-40 sp014384705-C5H11NO2              | 3           | dimgrey  |
| s__UMGS856 sp900760305-C5H11NO2             | 3           | dimgrey  |
| s__CAG-390 sp000437015-C5H11NO2             | 3           | dimgrey  |
| s__CAG-390 sp900753295-C5H11NO2             | 3           | dimgrey  |
| s__CAG-841 sp000437375-C5H11NO2             | 3           | dimgrey  |
| s__HGM12650 sp900761725-C5H11NO2            | 3           | dimgrey  |
| s__UMGS1002 sp900547565-C5H11NO2            | 3           | dimgrey  |

Table 5: WGS 4 different clusters cross-datasets WGS

| Pair                                         | Cluster num | Color   |
|----------------------------------------------|-------------|---------|
| s__UMGS1696 sp900763885-C5H11NO2             | 3           | dimgrey |
| s__SFLA01 sp004553575-C5H11NO2               | 3           | dimgrey |
| s__UCG-010 sp900754535-C5H11NO2              | 3           | dimgrey |
| s__CAG-103 sp900317855-C5H11NO2              | 3           | dimgrey |
| s__CAG-110 sp900546415-C5H11NO2              | 3           | dimgrey |
| s__CAG-110 sp900548795-C5H11NO2              | 3           | dimgrey |
| s__CAG-110 sp900551495-C5H11NO2              | 3           | dimgrey |
| s__CAG-110 sp900554625-C5H11NO2              | 3           | dimgrey |
| s__CAG-110 sp900769995-C5H11NO2              | 3           | dimgrey |
| s__CAG-170 sp000436735-C5H11NO2              | 3           | dimgrey |
| s__CAG-170 sp002437575-C5H11NO2              | 3           | dimgrey |
| s__CAG-170 sp900548625-C5H11NO2              | 3           | dimgrey |
| s__CAG-83 sp900548615-C5H11NO2               | 3           | dimgrey |
| s__Flavonifractor massiliensis_A-C5H11NO2    | 3           | dimgrey |
| s__Marseille-P3106 sp900169975-C5H11NO2      | 3           | dimgrey |
| s__Pseudoflavonifractor sp900079765-C5H11NO2 | 3           | dimgrey |
| s__Anaerotruncus rubiinfantis-C5H11NO2       | 3           | dimgrey |
| s__Anaerotruncus sp014385085-C5H11NO2        | 3           | dimgrey |
| s__Massilimaliae massiliensis-C5H11NO2       | 3           | dimgrey |
| s__UBA1394 sp002305725-C5H11NO2              | 3           | dimgrey |
| s__BX12 sp009911365-C5H11NO2                 | 3           | dimgrey |
| s__CAG-145 sp900545135-C5H11NO2              | 3           | dimgrey |
| s__CAG-238 sp002439735-C5H11NO2              | 3           | dimgrey |
| s__Phil1 sp001940855-C5H11NO2                | 3           | dimgrey |
| s__Firm-11 sp900548145-C5H11NO2              | 3           | dimgrey |
| s__SFFS01 sp004557805-C5H11NO2               | 3           | dimgrey |
| s__NSJ-63 sp014384805-C5H11NO2               | 3           | dimgrey |
| s__Alistipes onderdonkii-C6H13NO2            | 4           | k       |
| s__Alistipes sp002358415-C6H13NO2            | 4           | k       |
| s__Alistipes sp002362235-C6H13NO2            | 4           | k       |
| s__Alistipes sp900290115-C6H13NO2            | 4           | k       |
| s__Alistipes sp900541585-C6H13NO2            | 4           | k       |
| s__Alistipes sp902388705-C6H13NO2            | 4           | k       |
| s__UMGS2068 sp900769635-C6H13NO2             | 4           | k       |
| s__Anaerofustis stercorihominis-C6H13NO2     | 4           | k       |
| s__Blautia_A luti-C3H5O3-                    | 4           | k       |
| s__Blautia_A sp900540785-C4H4N2O2            | 4           | k       |
| s__CAG-317 sp011960265-C4H4N2O2              | 4           | k       |
| s__HGM11523 sp900756545-C6H13NO2             | 4           | k       |
| s__Agathobaculum sp900291975-C6H13NO2        | 4           | k       |
| s__Lawsonibacter sp900066825-C6H13NO2        | 4           | k       |
| s__Lawsonibacter sp900764755-C6H13NO2        | 4           | k       |
| s__Anaerotruncus colihominis-C6H13NO2        | 4           | k       |
| s__UBA1409 sp002305045-C24H40O5              | 4           | k       |
| s__BX12 sp009911365-C6H13NO2                 | 4           | k       |

Table 5: WGS 4 different clusters cross-datasets WGS

| Pair                               | Cluster num | Color |
|------------------------------------|-------------|-------|
| s__CAG-145 sp900545135-C6H13NO2    | 4           | k     |
| s__Emergencia sp009935805-C6H13NO2 | 4           | k     |
| s__Mogibacterium timidum-C4H4N2O2  | 4           | k     |
| s__RUG100 sp900315555-C6H13NO2     | 4           | k     |
| s__Fusobacterium_A varium-C4H4N2O2 | 4           | k     |

Table 6: Acronym table

| Acronym | Meaning                                                                  |
|---------|--------------------------------------------------------------------------|
| LOCATE  | Latent Of miCrobiome And meTabolites rELations                           |
| ML      | Machine Learning                                                         |
| SCFA    | Short Chain Fatty Acids                                                  |
| T1D     | Type 1 Diabetes                                                          |
| IBD     | Inflammatory bowel disease                                               |
| T2D     | Type 2 Diabetes                                                          |
| DNN     | Deep Neural Networks                                                     |
| CNN     | Convolutional neural networks                                            |
| PRMT    | Predicted Relative Metabolomic Turnover                                  |
| MIMOSA  | Model-based Integration of Metabolite Observations and Species Abundance |
| MLPNN   | multiple-layer perceptron neural network                                 |
| WGS     | whole genome shotgun sequencing                                          |
| HDG     | healthy dietary guidelines                                               |
| MRS     | magnetic resonance spectroscopy                                          |
| DSC     | deep subcutaneous                                                        |
| SSC     | superficial subcutaneous                                                 |
| VAT     | Visceral adipose tissue                                                  |
| CD      | Crohn's disease                                                          |
| UC      | Ulcerative colitis                                                       |
| ESRD    | end-stage renal disease                                                  |
| NMF     | Non Negative Matrix Factorization                                        |
| NNI     | Neural Network Intelligence                                              |
| MSE     | Mean Square Error                                                        |
| SCC     | Spearman Correlation Coefficient                                         |
| AUC     | Area Under the ROC Curve                                                 |
| CCA     | Canonical-Correlation Analysis                                           |
| SVD     | Singular value decomposition                                             |
| CRC     | Colorectal cancer                                                        |

## References

- [1] Roktaek Lim, Josephine Jill T. Cabatbat, Thomas L.P. Martin, Haneul Kim, Seunghyeon Kim, Jaeyun Sung, Cheol-Min Ghim, and Pan-Jun Kim. Large-scale metabolic interaction network of the mouse and human gut microbiota. *Scientific Data*, 7(1):1–8, 2020.
- [2] Peter E. Larsen, Frank R. Collart, Dawn Field, Folker Meyer, Kevin P. Keegan, Christopher S. Henry, John McGrath, John Quinn, and Jack A. Gilbert. Predicted relative metabolomic turnover (prmt): determining metabolic turnover from a coastal marine metagenomic dataset. *Microbial Informatics and Experimentation*, 1(1):1–11, 2011.
- [3] Cecilia Noecker, Alexander Eng, Sujatha Srinivasan, Casey M. Theriot, Vincent B. Young, Janet K. Jansson, David N. Fredricks, and Elhanan Borenstein. Metabolic model-based integration of microbiome taxonomic and metabolomic profiles elucidates mechanistic links between ecological and metabolic variation. *MSystems*, 1(1):e00013–15, 2016.
- [4] Cecilia Noecker, Alexander Eng, Efrat Muller, and Elhanan Borenstein. Mimosa2: a metabolic network-based tool for inferring mechanism-supported relationships in microbiome-metabolome data. *Bioinformatics*, 38(6):1615–1623, 2022.
- [5] Xiaochen Yin, Tomer Altman, Erica Rutherford, Kiana A. West, Yonggan Wu, Jinlyung Choi, Paul L. Beck, Gilaad G. Kaplan, Karim Dabbagh, Todd Z. DeSantis, et al. A comparative evaluation of tools to predict metabolite profiles from microbiome sequencing data. *Frontiers in Microbiology*, 11:3132, 2020.
- [6] Himel Mallick, Eric A. Franzosa, Lauren J. McIver, Soumya Banerjee, Alexandra Sirota-Madi, Aleksandar D. Kostic, Clary B. Clish, Hera Vlamakis, Ramnik J. Xavier, and Curtis Huttenhower. Predictive metabolomic profiling of microbial communities using amplicon or metagenomic sequences. *Nature Communications*, 10(1):1–11, 2019.
- [7] Derek Reiman, Brian T. Layden, and Yang Dai. Mimenet: Exploring microbiome-metabolome relationships using neural networks. *PLOS Computational Biology*, 17(5):e1009021, 2021.
- [8] Vuong Le, Thomas P. Quinn, Truyen Tran, and Svetha Venkatesh. Deep in the bowel: highly interpretable neural encoder-decoder networks predict gut metabolites from gut microbiome. *BMC Genomics*, 21(4):1–15, 2020.
- [9] Anat Yaskolka Meir, Ehud Rinott, Gal Tsaban, Hila Zelicha, Alon Kaplan, Philip Rosen, Ilan Shelef, Ilan Youngster, Aryeh Shalev, Matthias Blüher, et al. Effect of green-mediterranean diet on intrahepatic fat: the direct plus randomised controlled trial. *Gut*, 70(11):2085–2095, 2021.
- [10] Minsuk Kim, Emily Vogtmann, David A. Ahlquist, Mary E. Devens, John B Kisiel, William R. Taylor, Bryan A. White, Vanessa L. Hale, Jaeyun Sung, Nicholas Chia, et al. Fecal metabolomic signatures in colorectal adenoma patients are associated with gut microbiota and early events of colorectal cancer pathogenesis. *MBio*, 11(1):e03186–19, 2020.
- [11] Xuan He, Mariana Parenti, Tove Grip, Bo Lönnerdal, Niklas Timby, Magnus Domellöf, Olle Hernell, and Carolyn M Slupsky. Fecal microbiome and metabolome of infants fed bovine mfgm supplemented formula or standard formula with breast-fed infants as reference: a randomized controlled trial. *Scientific Reports*, 9(1):1–14, 2019.

- [12] Jonathan P Jacobs, Maryam Goudarzi, Namita Singh, Maomeng Tong, Ian H. McHardy, Paul Ruegger, Miro Asadourian, Bo-Hyun Moon, Allyson Ayson, James Borneman, et al. A disease-associated microbial and metabolomics state in relatives of pediatric inflammatory bowel disease patients. *Cellular and Molecular Gastroenterology and Hepatology*, 2(6):750–766, 2016.
- [13] Mathilde Poyet, Mathieu Groussin, Sean M. Gibbons, J. Avila-Pacheco, Xiaofang Jiang, Sean M. Kearney, A.R. Perrotta, B. Berdy, S. Zhao, T.D. Lieberman, et al. A library of human gut bacterial isolates paired with longitudinal multiomics data enables mechanistic microbiome research. *Nature Medicine*, 25(9):1442–1452, 2019.
- [14] Pande Putu Erawijantari, Sayaka Mizutani, Hirotsugu Shiroma, Satoshi Shiba, Takeshi Nakajima, Taku Sakamoto, Yutaka Saito, Shinji Fukuda, Shinichi Yachida, and Takuji Yamada. Influence of gastrectomy for gastric cancer treatment on faecal microbiome and metabolome profiles. *Gut*, 69(8):1404–1415, 2020.
- [15] Eric A. Franzosa, Alexandra Sirota-Madi, Julian Avila-Pacheco, Nadine Fornelos, Henry J. Haider, Stefan Reinker, Tommi Vatanen, A Brantley Hall, Himel Mallick, Lauren J. McIver, et al. Gut microbiome structure and metabolic activity in inflammatory bowel disease. *Nature Microbiology*, 4(2):293–305, 2019.
- [16] Ruben AT Mars, Yi Yang, Tonya Ward, Mo Houtti, Sambhawa Priya, Heather R Lekatz, Xiaojia Tang, Zhifu Sun, Krishna R. Kalari, Tal Korem, et al. Longitudinal multi-omics reveals subset-specific mechanisms underlying irritable bowel syndrome. *Cell*, 182(6):1460–1473, 2020.
- [17] Xifan Wang, Songtao Yang, Shenghui Li, Liang Zhao, Yanling Hao, Junjie Qin, Lian Zhang, Chengying Zhang, Weijing Bian, LI Zuo, et al. Aberrant gut microbiota alters host metabolome and impacts renal failure in humans and rodents. *Gut*, 69(12):2131–2142, 2020.
- [18] Shinichi Yachida, Sayaka Mizutani, Hirotsugu Shiroma, Satoshi Shiba, Takeshi Nakajima, Taku Sakamoto, Hikaru Watanabe, Keigo Masuda, Yuichiro Nishimoto, Masaru Kubo, et al. Metagenomic and metabolomic analyses reveal distinct stage-specific phenotypes of the gut microbiota in colorectal cancer. *Nature Medicine*, 25(6):968–976, 2019.
